# Exposure to Ambient Particulate Matter during Pregnancy: Implications for Infant Telomere Length

Nina E. Ahlers<sup>1</sup>, Jue Lin<sup>2</sup>, Sandra J. Weiss<sup>1</sup>

<sup>1</sup>Department of Community Health Systems, University of California, San Francisco, CA, USA.

<sup>2</sup>Department of Biochemistry and Biophysics, University of California, San Francisco, CA, USA

This manuscript has been withdrawn by the authors as it was submitted and made public without the full consent of all the authors. Therefore, the authors do not wish this work to be cited as reference for the project. If you have any questions, please contact the corresponding author.

The authors have an approved version for citation that is peer reviewed. Ahlers, N.E.; Lin, J.; Weiss, S.J. Exposure to Ambient Particulate Matter during Pregnancy: Implications for Infant Telomere Length. *Air* 2024, 2, 24-37. <https://doi.org/10.3390/air2010002>
